# Supplementary material
Source: Springer Nature journal article supplement (https://www.springermedizin.de/resource/supplementary/12933_2007_101_MOESM2_ESM.pdf/9539590)
Supplement: MOESM2 [file 9539590]

**Table 6 - Prevalence estimates of the metabolic syndrome of some published studies compared to the GEMCAS population**

| Country          | Study name                              | Study cohort                                       | Sample size | Age range | Definition             | Prevalence %              | GEMCAS, % (n) *                 | Reference |
|------------------|-----------------------------------------|----------------------------------------------------|-------------|-----------|------------------------|---------------------------|---------------------------------|-----------|
| Korea            | -                                       | medical check-up based, Seoul + Kyung-Gi province  | 40,698      | 20-82     | NCEP 2001 + medication | 6.8 (10.9) <sup>†</sup>   | 20.2                            | [26]      |
| China            | InterASIA                               | nationwide                                         | 15,540      | 35-74     | NCEP 2001 + medication | 13.7 (15.8) <sup>†</sup>  | 23.3 (24,885)                   | [28]      |
| Ireland          | -                                       | primary care, metropolitan (Cork and Kerry)        | 1,018       | 50-69     | NCEP 2001              | 20.7                      | 25.9 (12,432)                   | [14]      |
| Italy            | PAMELA                                  | metropolitan (Monza)                               | 2,013       | 25-74     | (?)                    | 16.2                      | 19.7/21.5 <sup>‡</sup> (28,610) | [15]      |
| France           | -                                       | working cohort                                     |             | 30-65     | NCEP 2001              | 9.8                       | 13.4 (13,277)                   | [16]      |
| China, Hong Kong | -                                       | metropolitan, working                              | 1,513       | 18-66     | NCEP 2001 + medication | 9.6                       | 12.0 (15,963)                   | [17]      |
| Iran             | Tehran Lipid and Glucose                | metropolitan (Tehran)                              | 10,368      | >20       | NCEP 2001              | 30.1                      | 19.0                            | [13]      |
| Great Britain    | British Women's Heart and Health        | general practices, metropolitan (23 British towns) | 4,286       | 60-79     | NCEP 2001 + medication | 29.8                      | 21.0 (18,4) <sup>§</sup>        | [20]      |
| Oman             | Nizwa Healthy Life Style Project Survey | metropolitan (Nizwa)                               | 1,419       | >20       | NCEP 2001 + medication | 21.0                      | 19.7                            | [9]       |
| Greece           | The MetS-Greece Multicentre             | nationwide                                         | 4,153       | >18       | NCEP 2001 + medication | 23.6                      | 21.5                            | [11]      |
| US               | NHANES III (1988-1994)                  | nationwide                                         | 8,814       | >20       | NCEP 2001 + medication | 23.7 (24.1) <sup>  </sup> | 20.3                            | [18]      |
|                  | NHANES (1999-2000)                      | nationwide                                         | 1,677       | >20       | NCEP 2001 + medication | 27.0 (34.5) <sup>#</sup>  | 20.3                            | [19]      |

\* prevalence of the GEMCAS cohort estimated according to age range, sex employment status of the specific study population

<sup>†</sup> when an ethnicity adapted measure for obesity was used

<sup>‡</sup> depending on definition used (NCEP 2000/AHA 2004)

<sup>§</sup> these differences are even higher, since Lawlor et al. [20] modified the original NCEP-definition by using the HDL-C threshold for men (<1mmol/L instead of <1.3mmol/L for women). Applying this threshold to GEMCAS, only 18.4% of the women would have been classified as having MetSyn

<sup>||</sup> data in ( ) from same data set, but different publication [10]

<sup>#</sup> published in [10], probably different prevalences because of different sample sizes (n=3,601)
